# Supplementary material for: Conformationally restricted dynamic supramolecular catalysts for substrate-selective epoxidations
Source: Royal Society of Chemistry journal article supplement (doi:10.1039/c2ob06859a), 2012-01-01
Supplement: c2ob06859a.pdf [file c2ob06859a.pdf]

## Electronic supplementary Information (ESI)

# Conformationally Restricted Dynamic Supramolecular Catalysts for Substrate-Selective Epoxidations

Esmaeil Sheibani and Kenneth Wärnmark\*

### Table of contents

|                                                                  |     |
|------------------------------------------------------------------|-----|
| - GC calibration curves for substrates                           | S2  |
| - GC chromatograms and NMR spectra from competitive epoxidations | S6  |
| - Tables of substrate selectivity from GC and NMR analysis       | S16 |
| - NMR spectra of compound <b>4b</b> and <b>6b</b>                | S17 |

## Chromatograms and spectra and for the analysis of the competitive reactions

### GC calibration curves

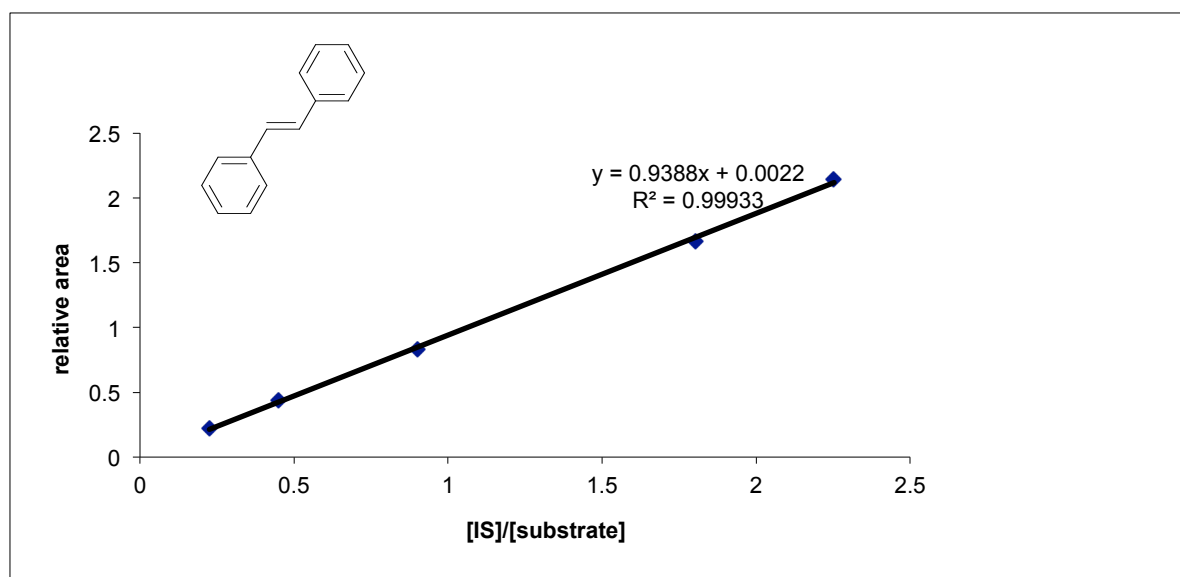

Fig. S1 GC-calibration curve for substrate 28b.

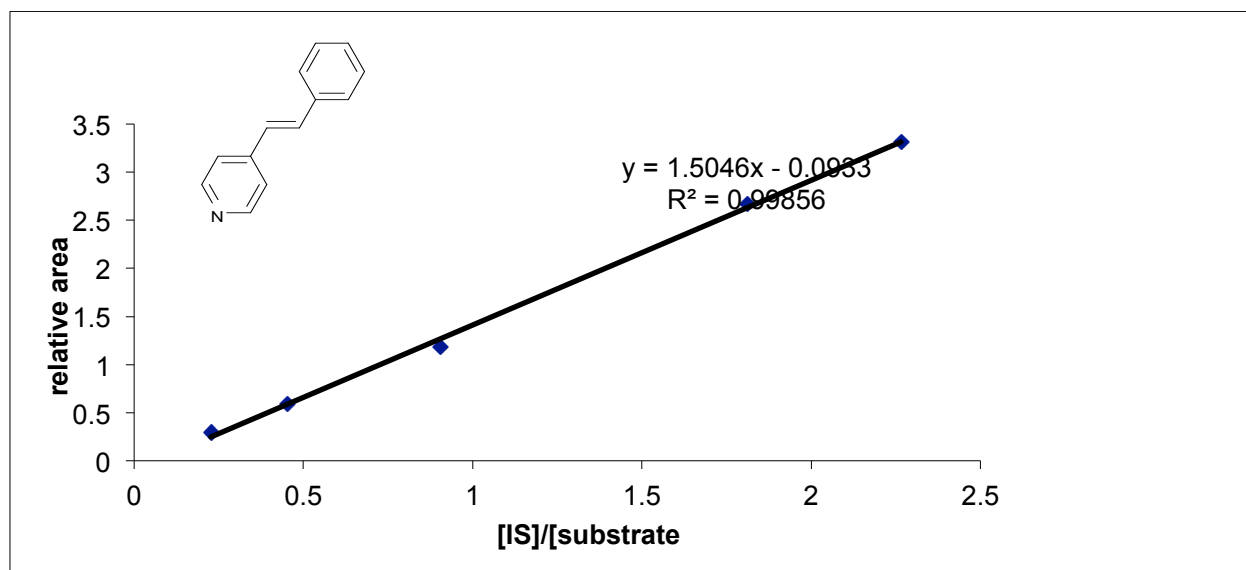

Fig. S2 GC-calibration curve for substrate 27b.

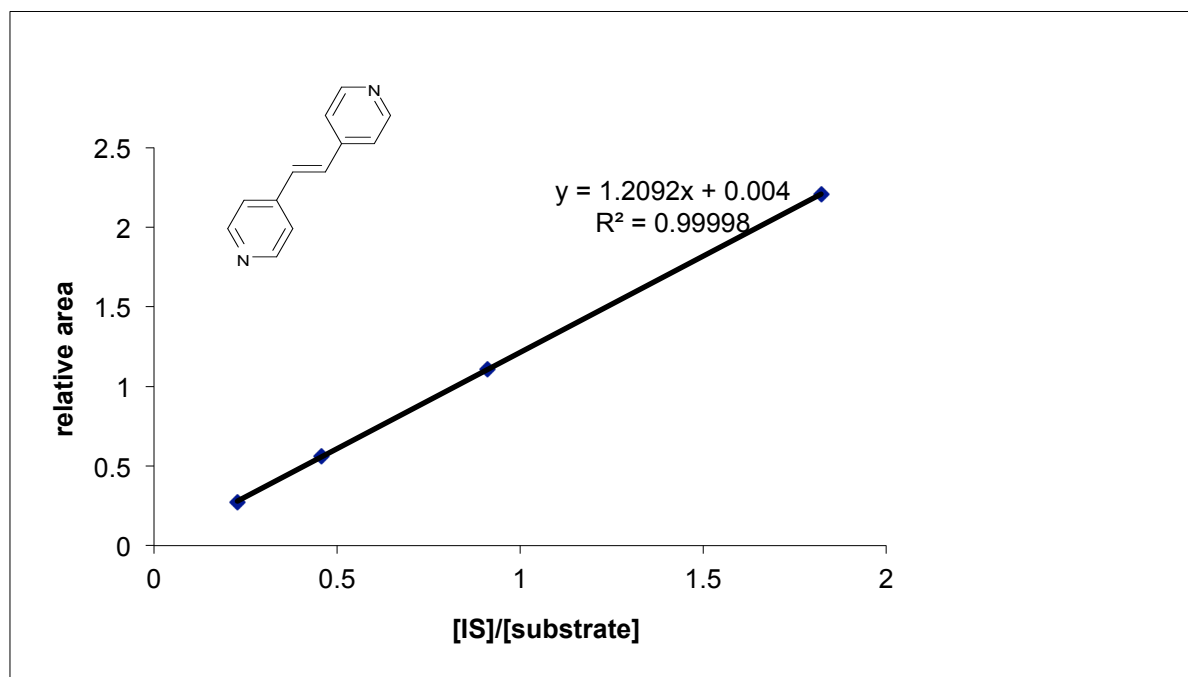

Fig. S3 GC-calibration curve for substrate 26b.

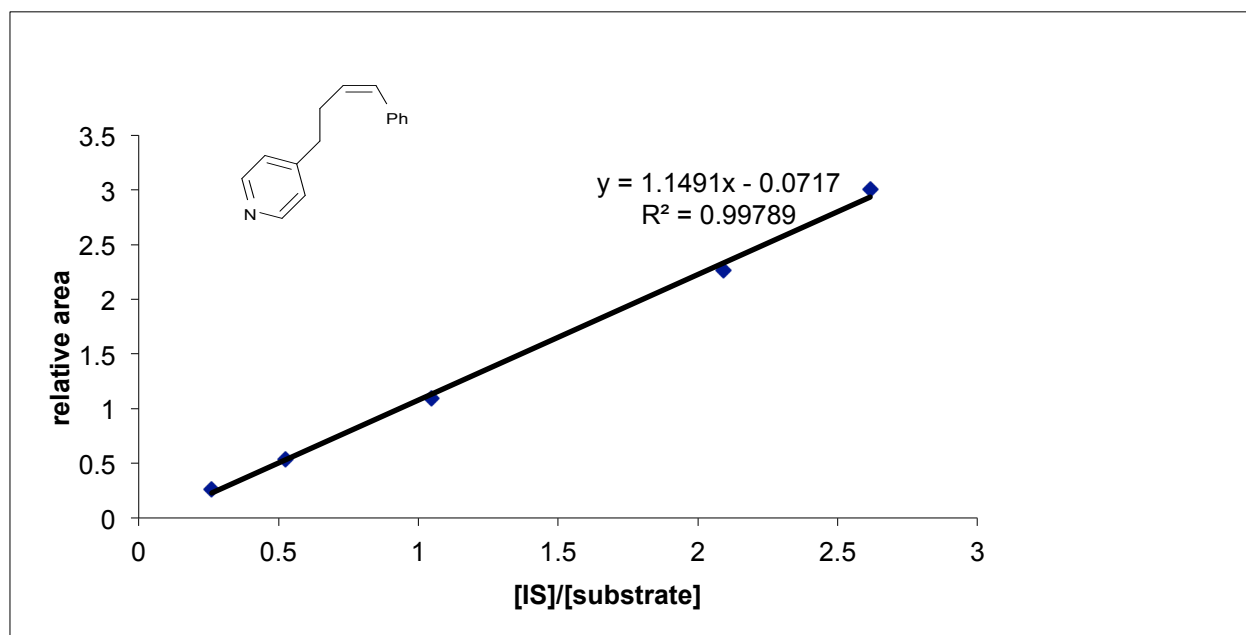

Fig. S4 GC-calibration curve for substrate 4a.

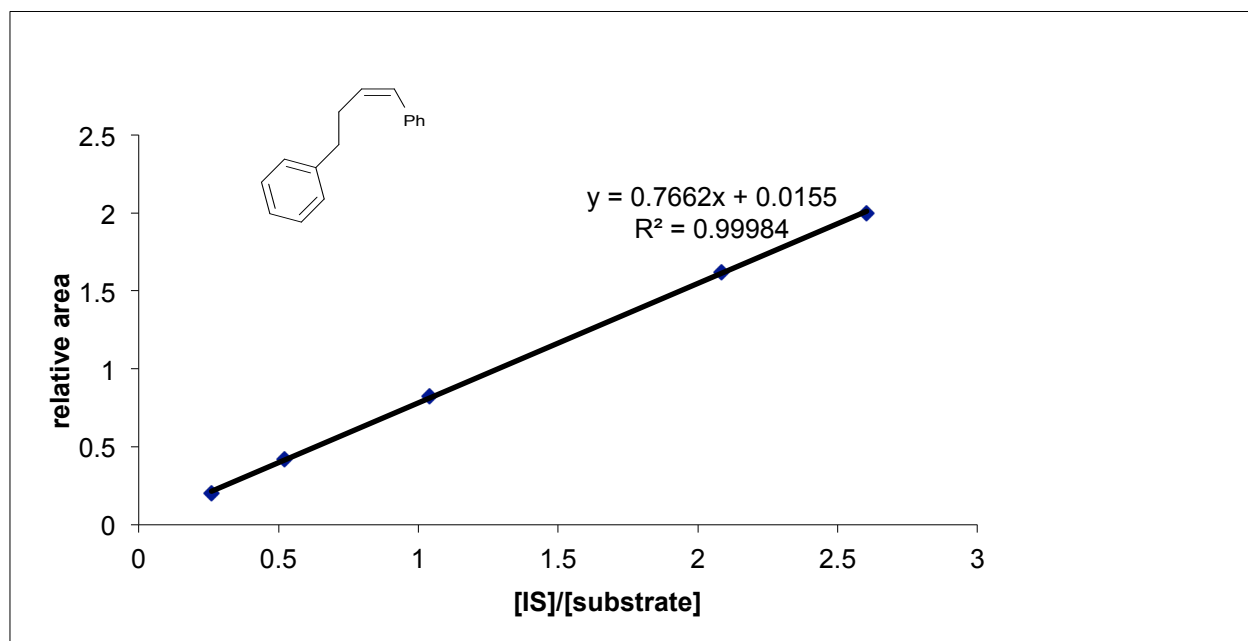

Fig. S5 GC-calibration curve for substrate 5a.

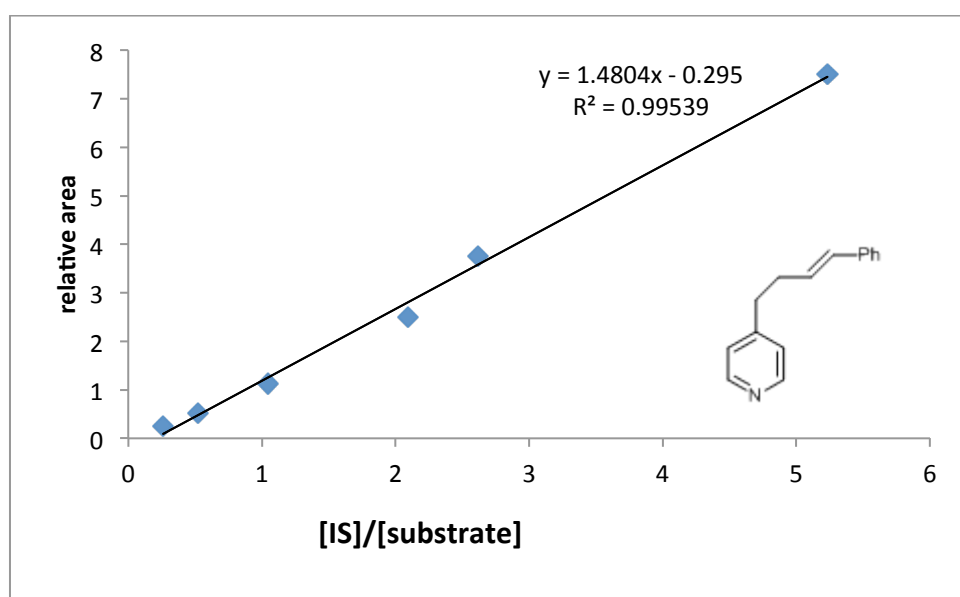

Fig. S6 GC-calibration curve for substrate 4b.

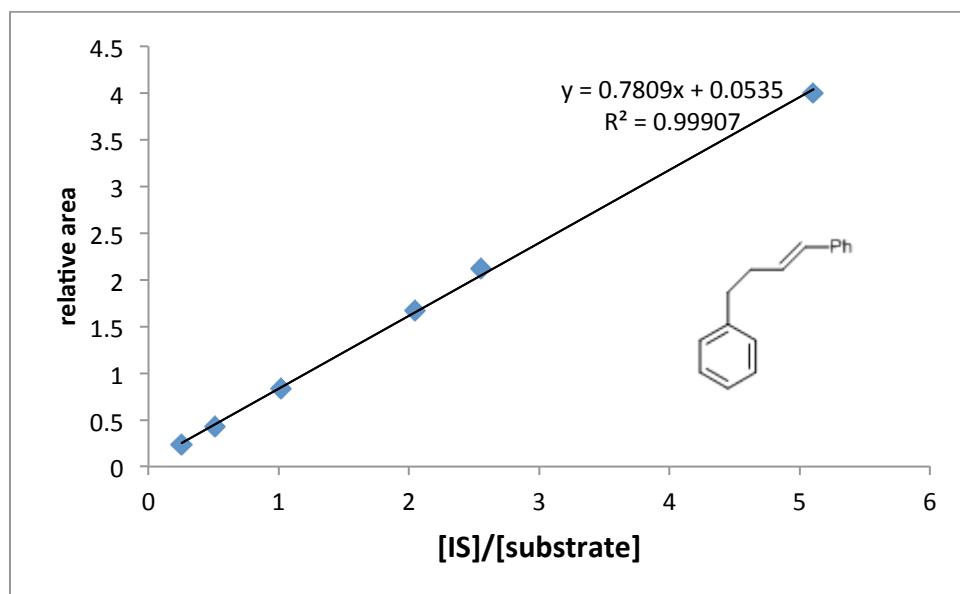

Fig. S7 GC-calibration curve for substrate **5b**.

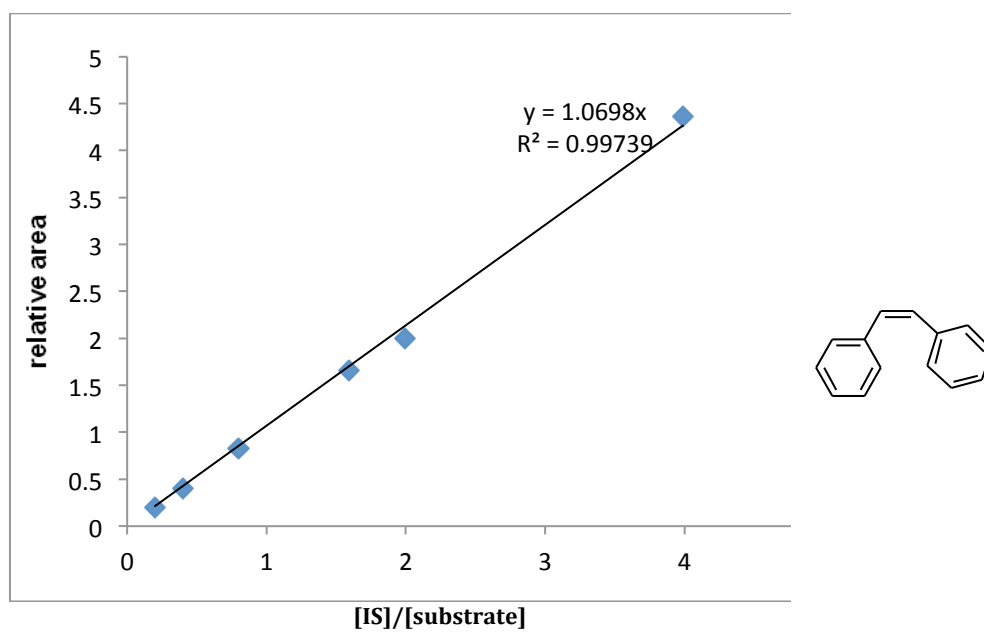

Fig. S8 GC-calibration curve for substrate **28a**.

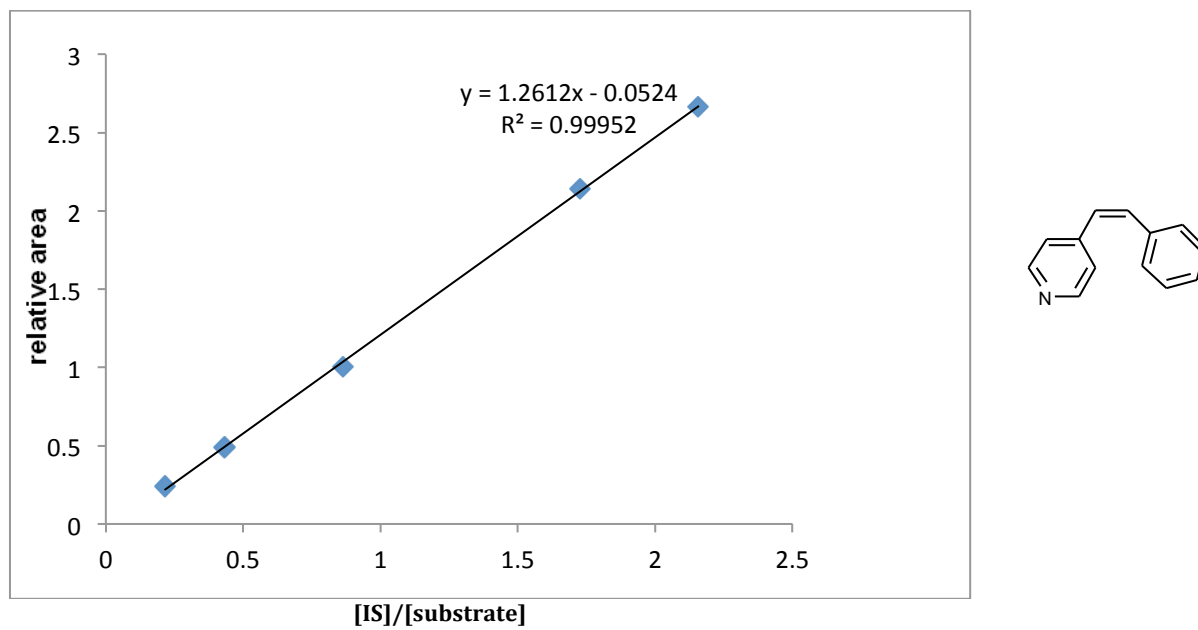

Fig. S9 GC-calibration curve for substrate 27a.

### Examples of chromatograms and spectra used to analyse the substrate selectivity

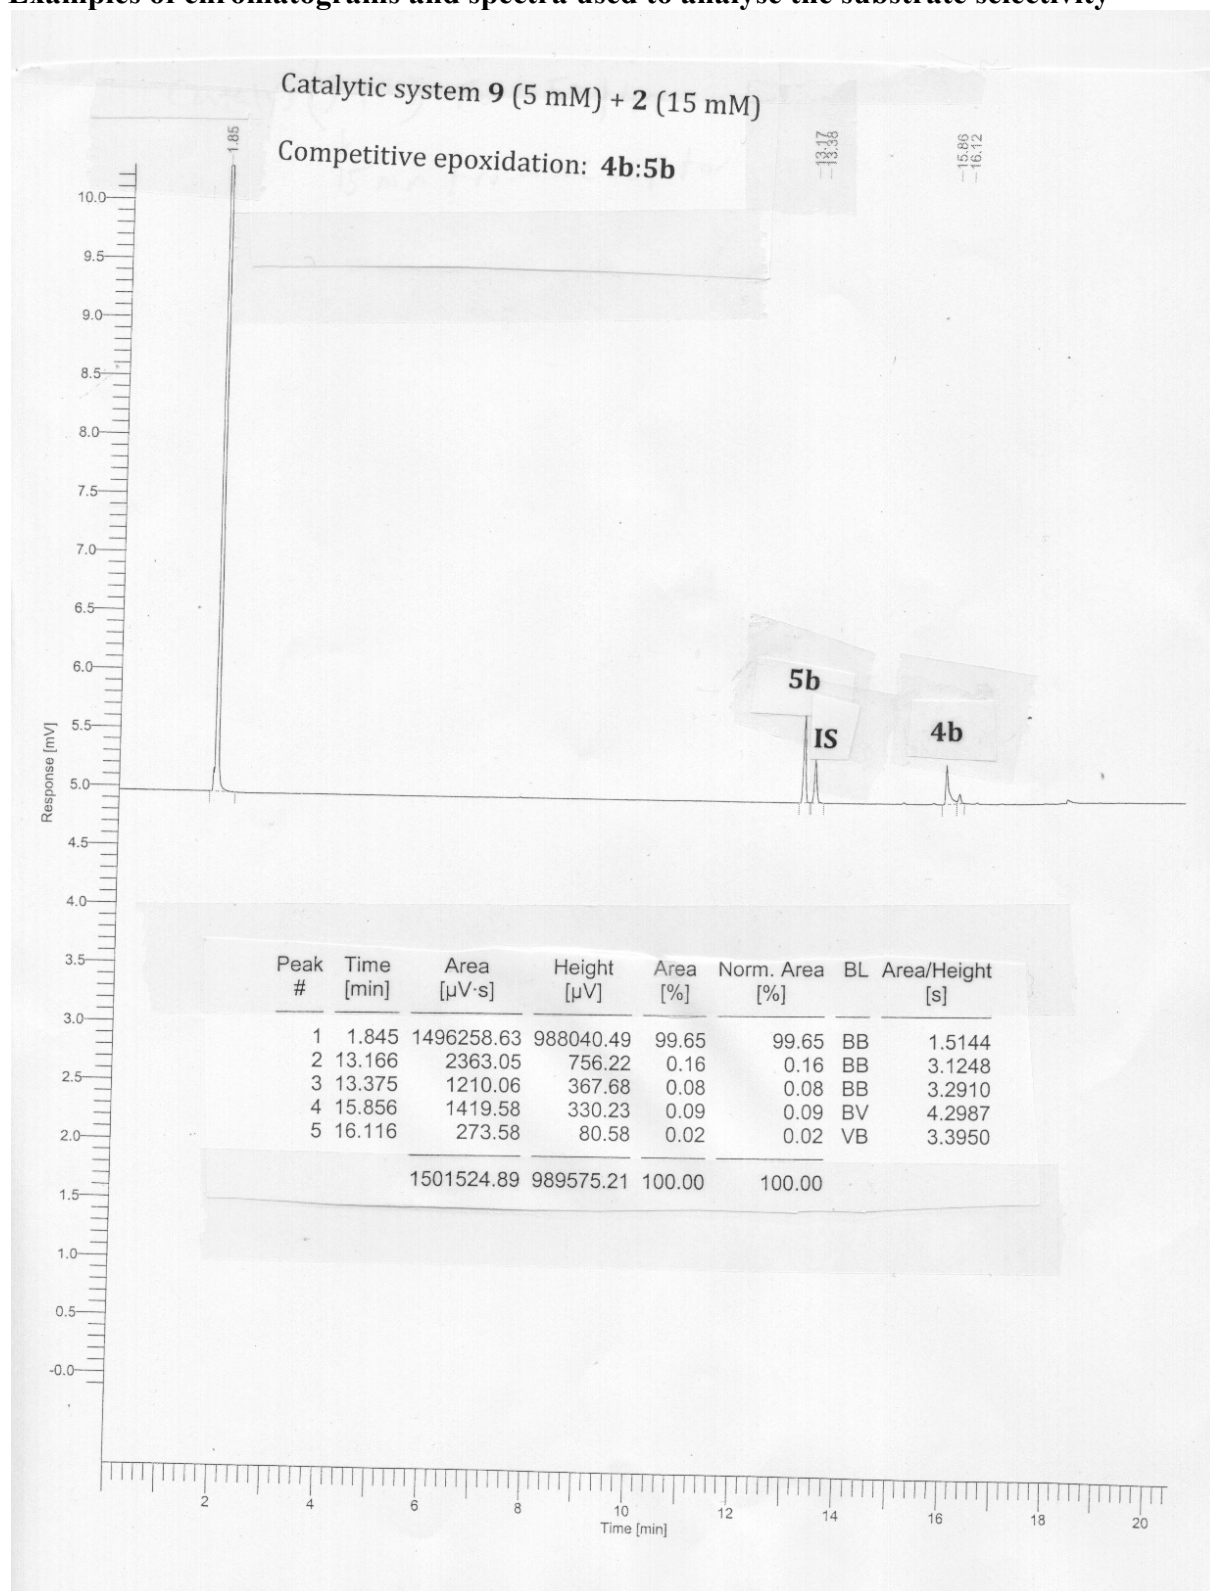

**Fig. S10** GC chromatogram for the analysis of substrate selectivity in the competitive epoxidation **4b** vs. **5b** using system **9** (5 mM) + **2** (15 mM) in  $\text{CH}_2\text{Cl}_2$ .

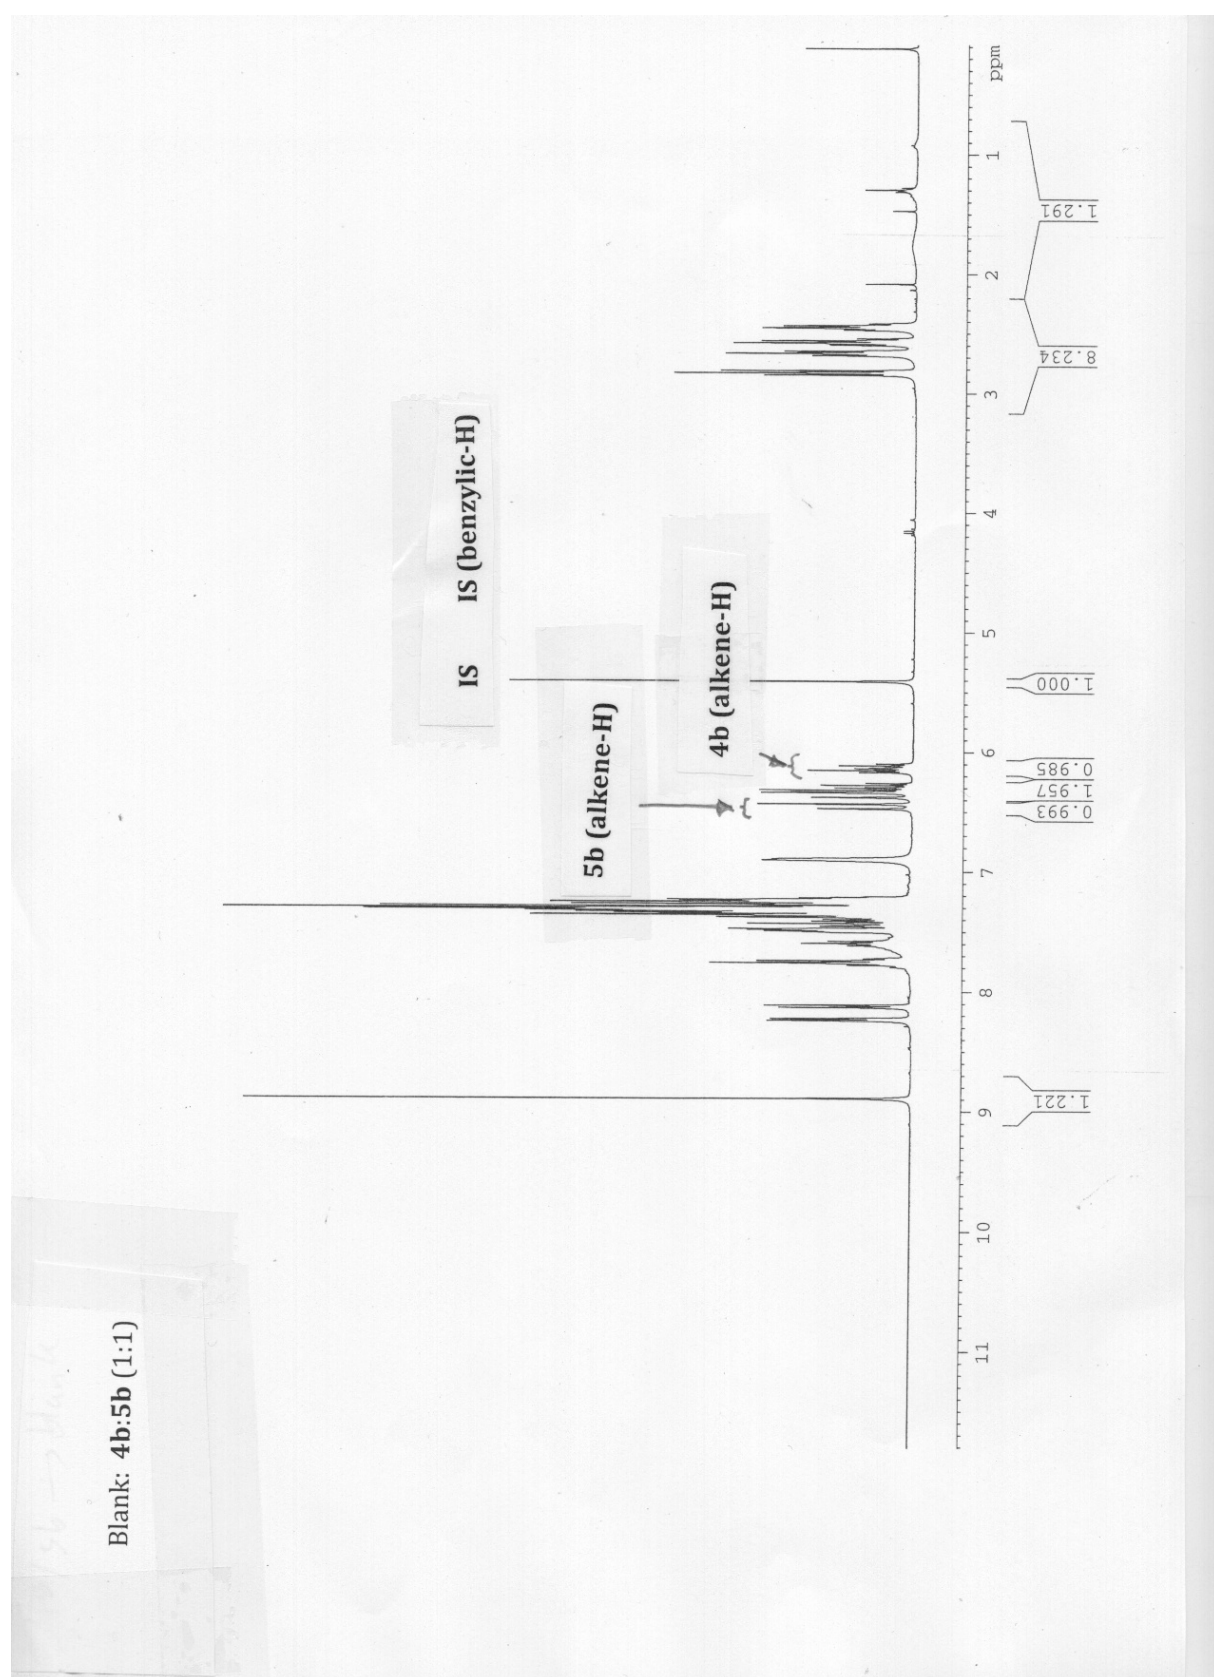

Fig. S11  $^1\text{H}$  NMR (400 MHz,  $\text{CDCl}_3$ ): Reference sample containing 4b:5b (1:1).



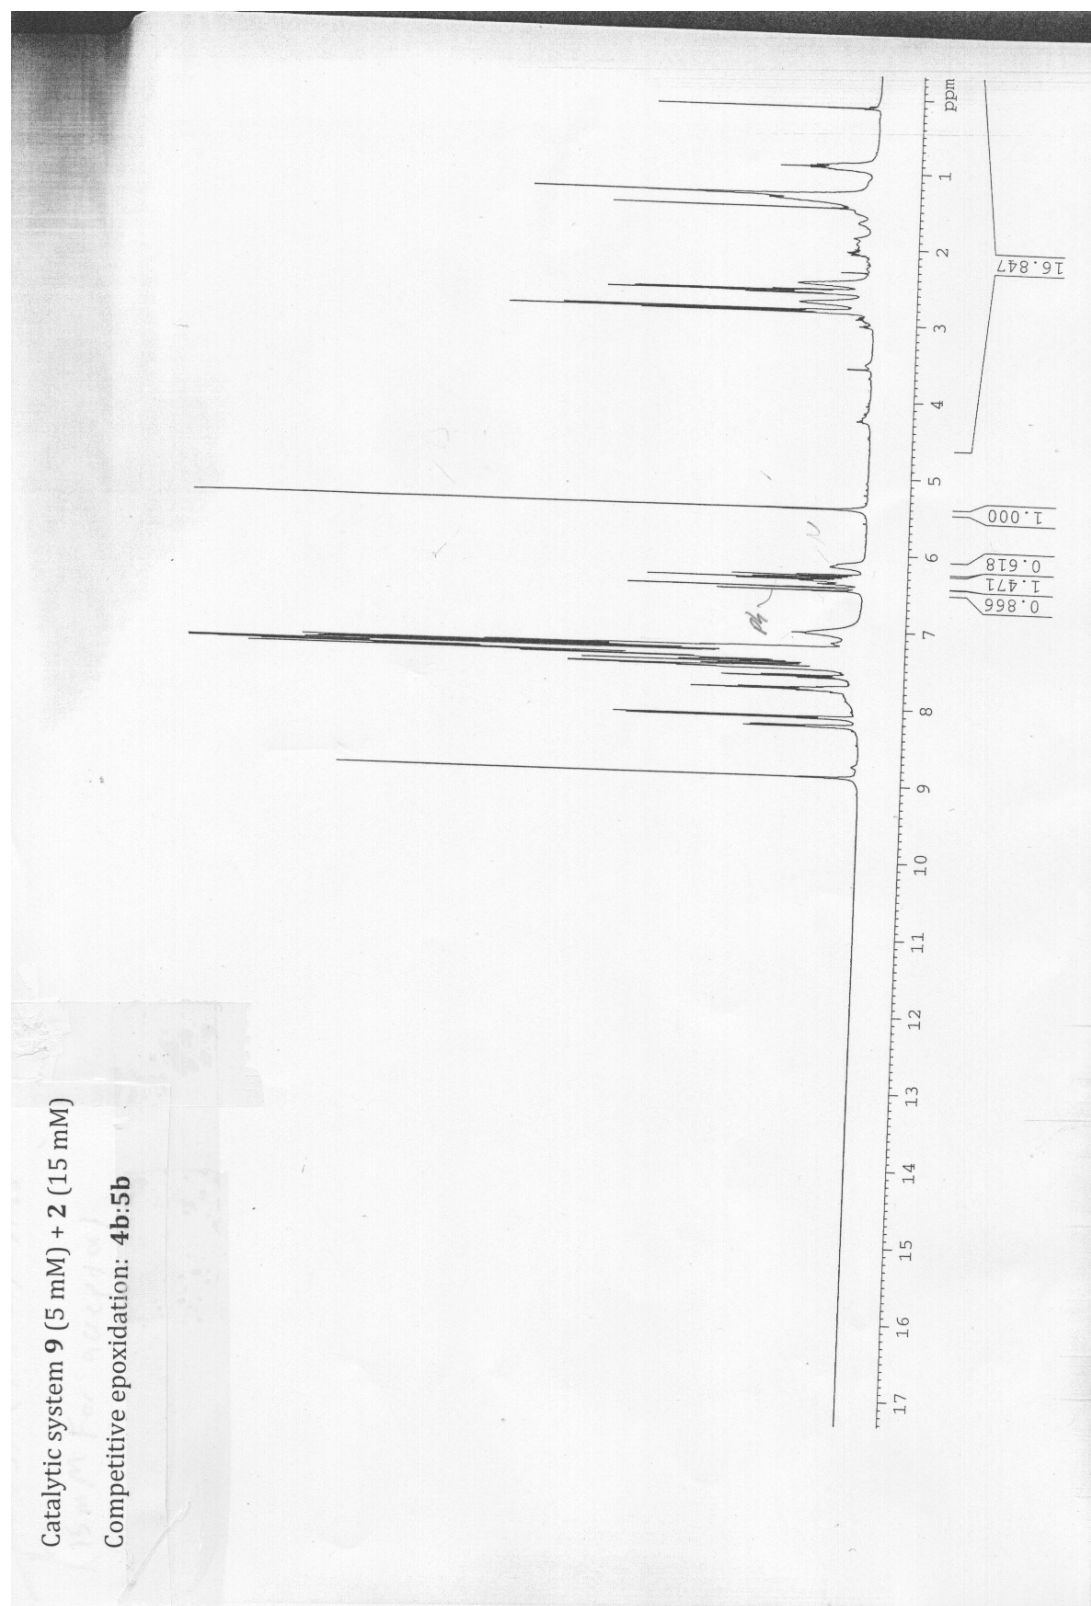

**Fig. S12** <sup>1</sup>H NMR (400 MHz, CDCl<sub>3</sub>) spectrum for the analysis of substrate selectivity in the competitive epoxidation **4b** vs. **5b** using system **9** (5 mM) + **2** (15 mM) in CH<sub>2</sub>Cl<sub>2</sub> as catalyst.

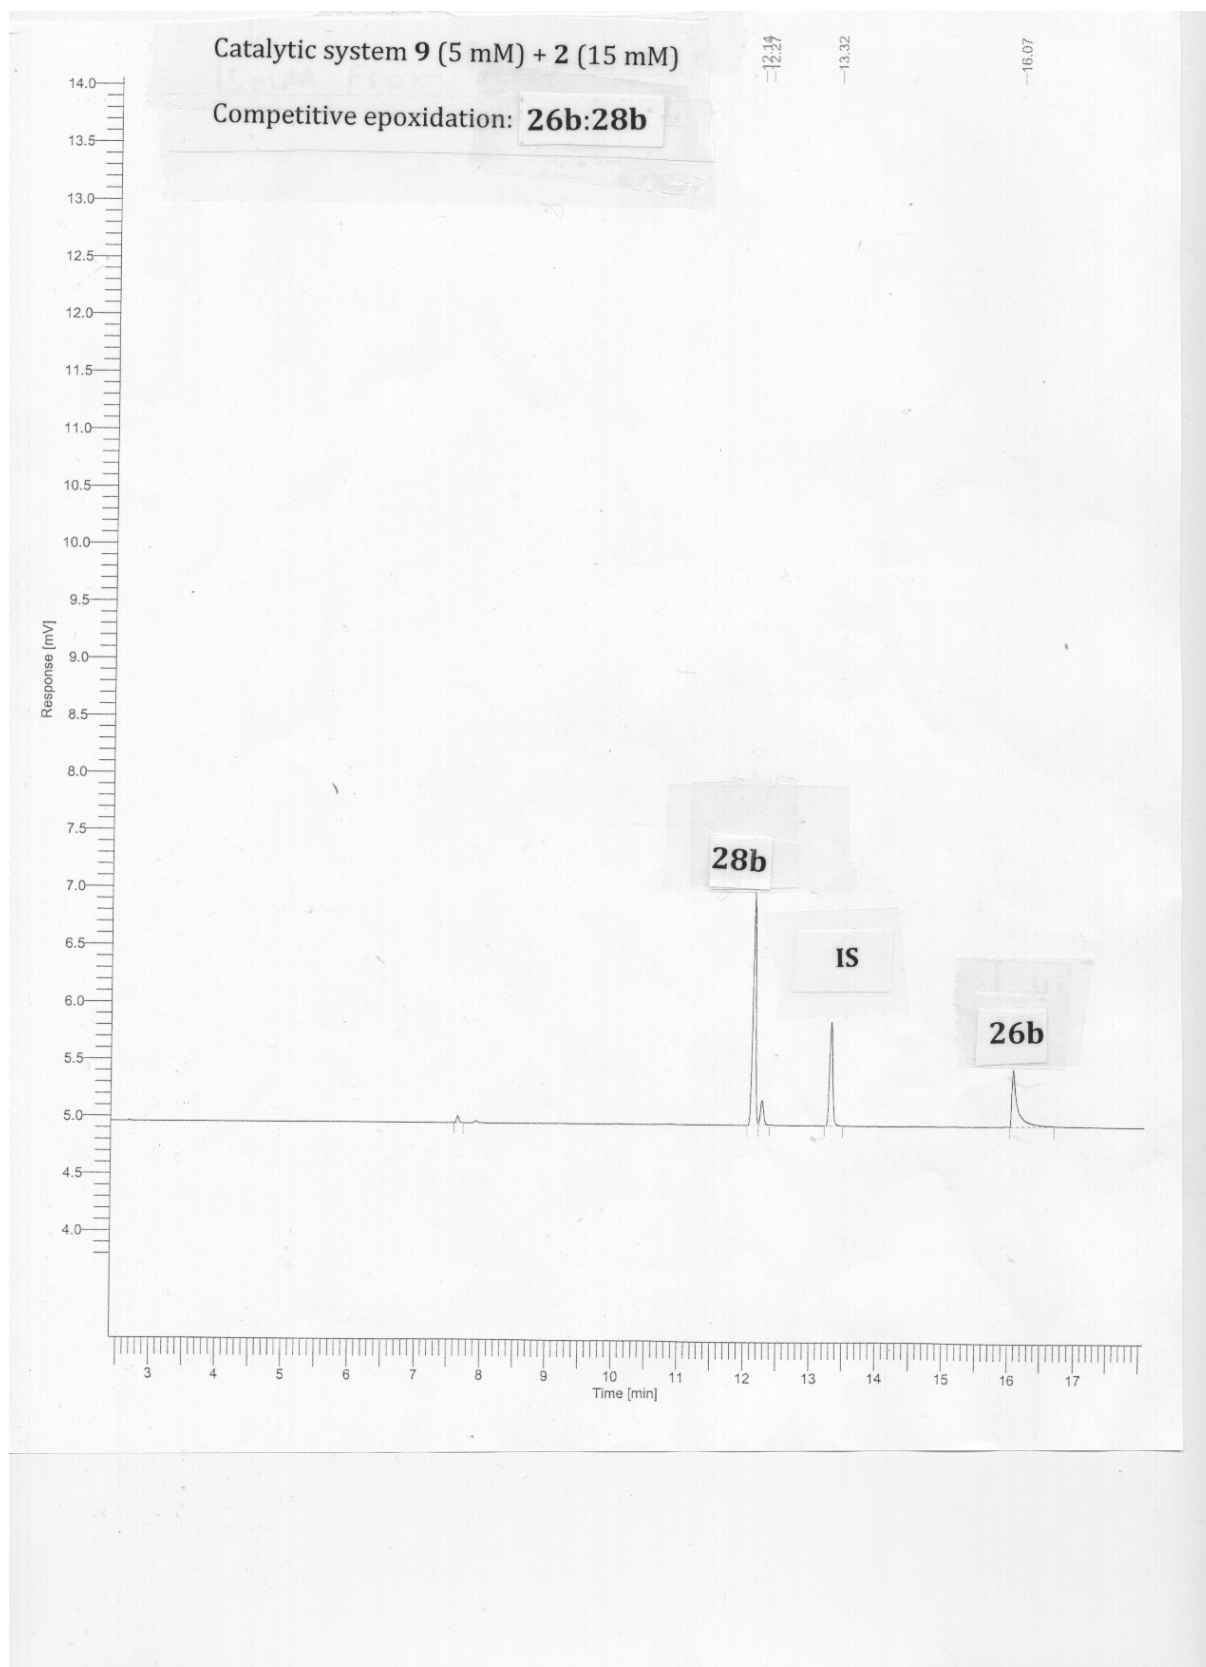

**Fig. S13** GC-chromatogram for the analysis of substrate selectivity in the competitive epoxidation **26b** vs. **28b** using system **9** (5 mM) + **2** (15 mM) in  $\text{CH}_2\text{Cl}_2$ .

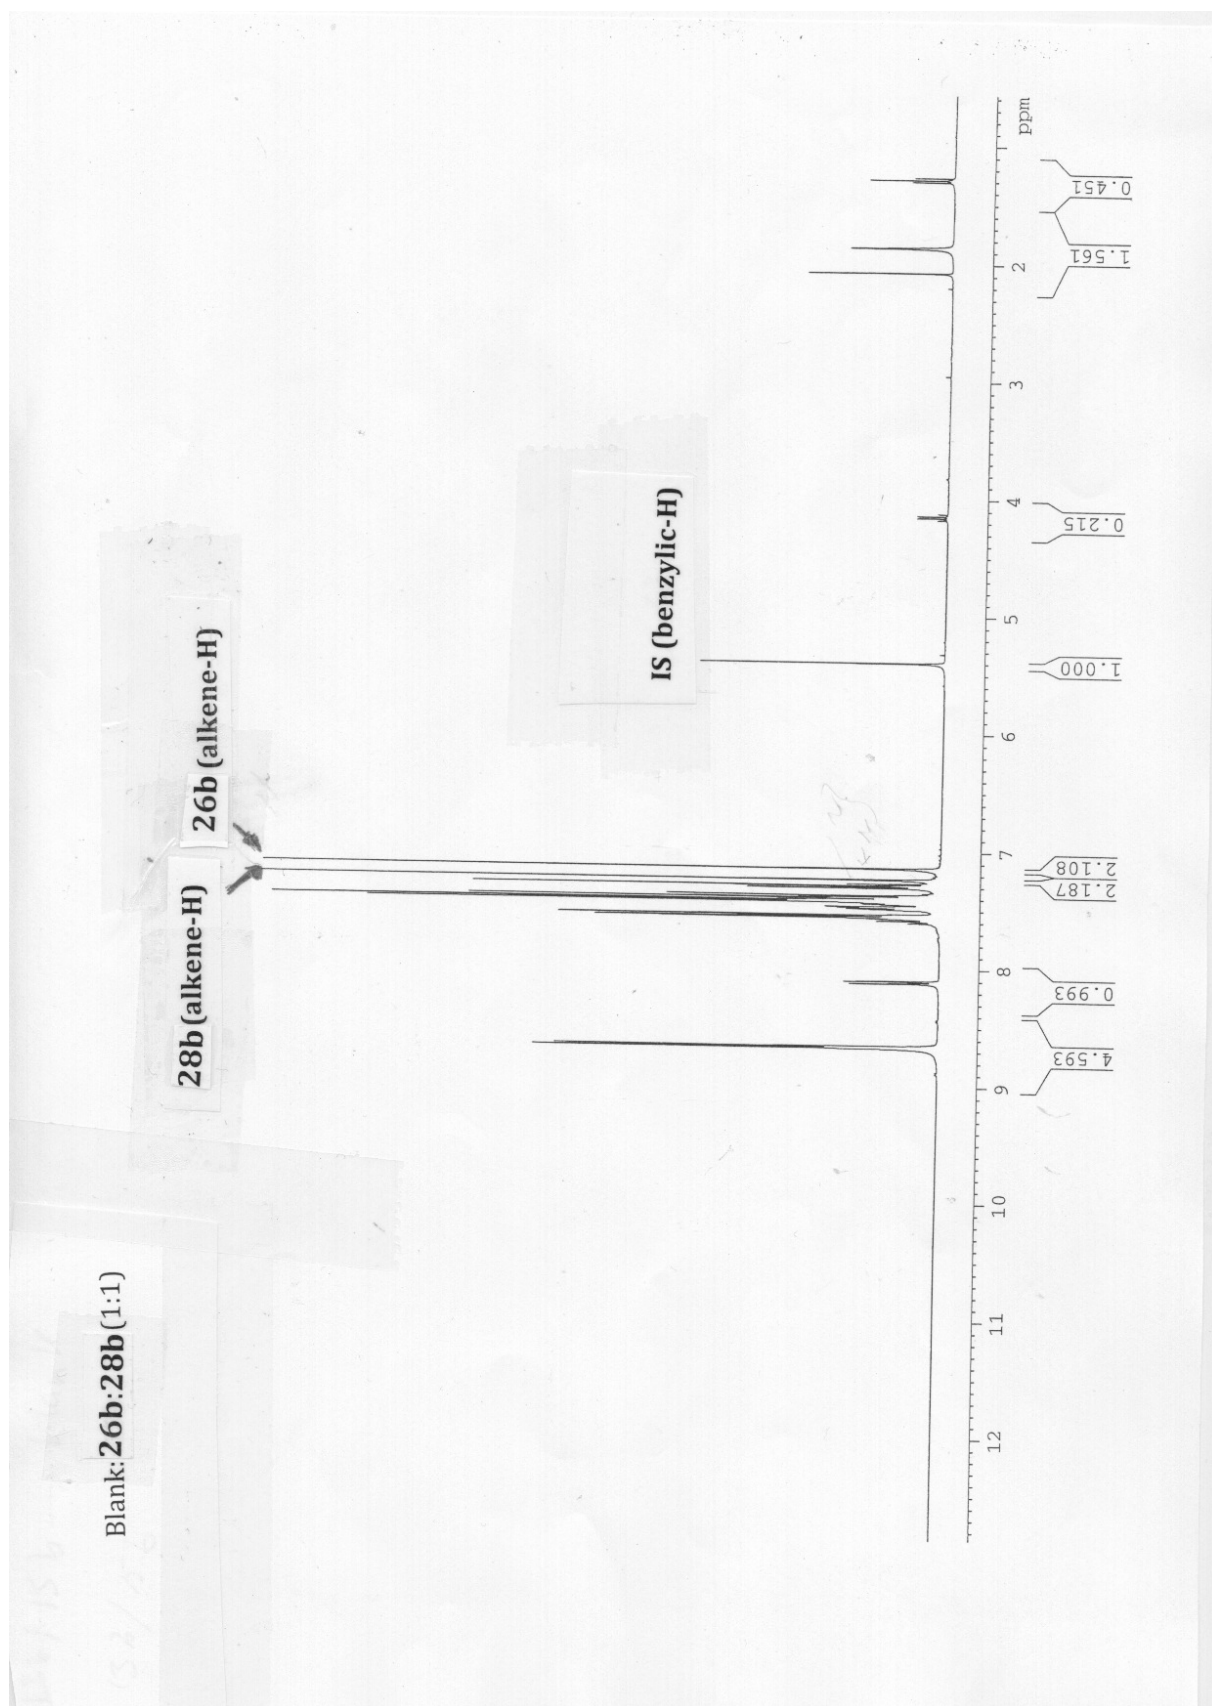

Fig. S14  $^1\text{H}$  NMR (400 MHz,  $\text{CDCl}_3$ ): Reference sample containing **26b:28b** (1:1).

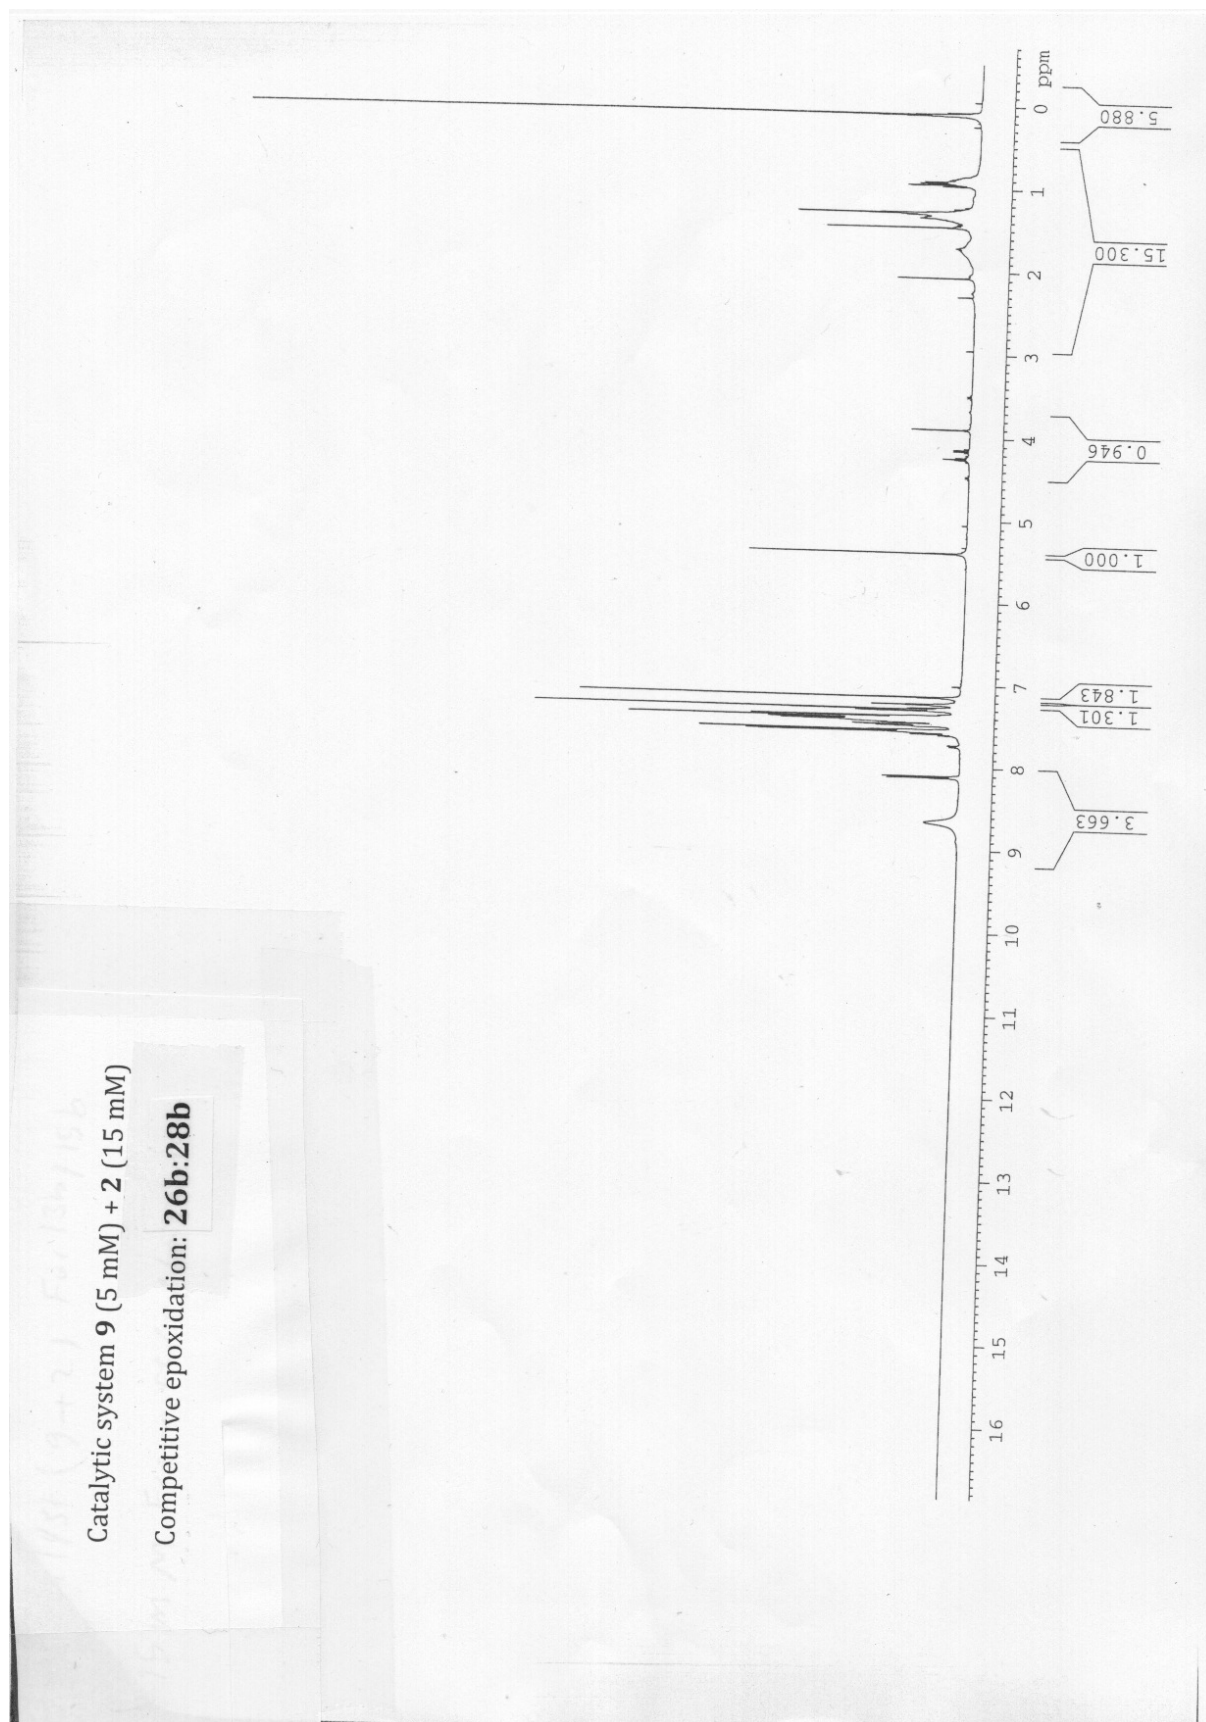

**Fig. S15**  $^1\text{H}$  NMR (400 MHz,  $\text{CDCl}_3$ ) spectrum for the analysis of substrate selectivity in the competitive epoxidation **26b** vs. **28b** using system **9** (5 mM) + **2** (15 mM) in  $\text{CH}_2\text{Cl}_2$  as catalyst.

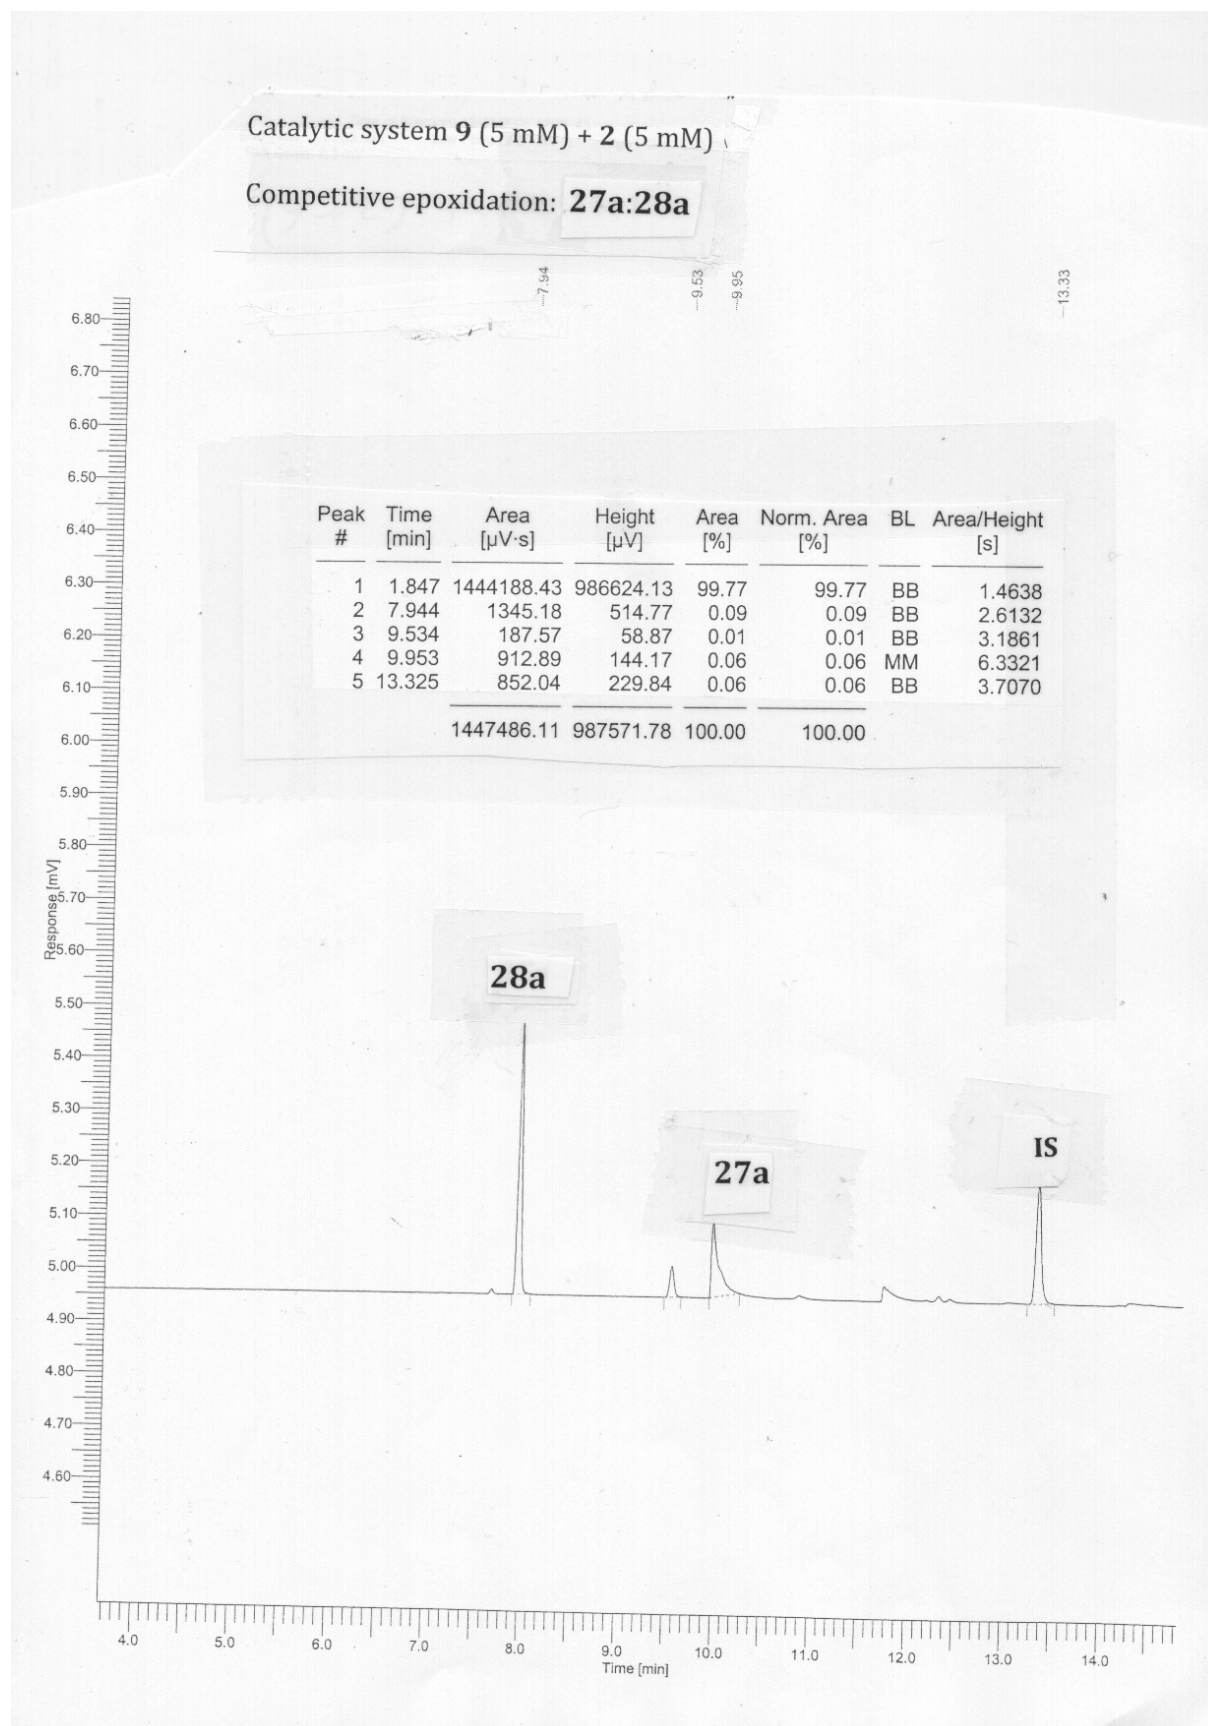

**Fig. S16** GC-chromatogram for the analysis of substrate selectivity in the competitive epoxidation **27a** vs. **28a** using system **9** (5 mM) + **2** (5 mM) in  $\text{CH}_2\text{Cl}_2$ .

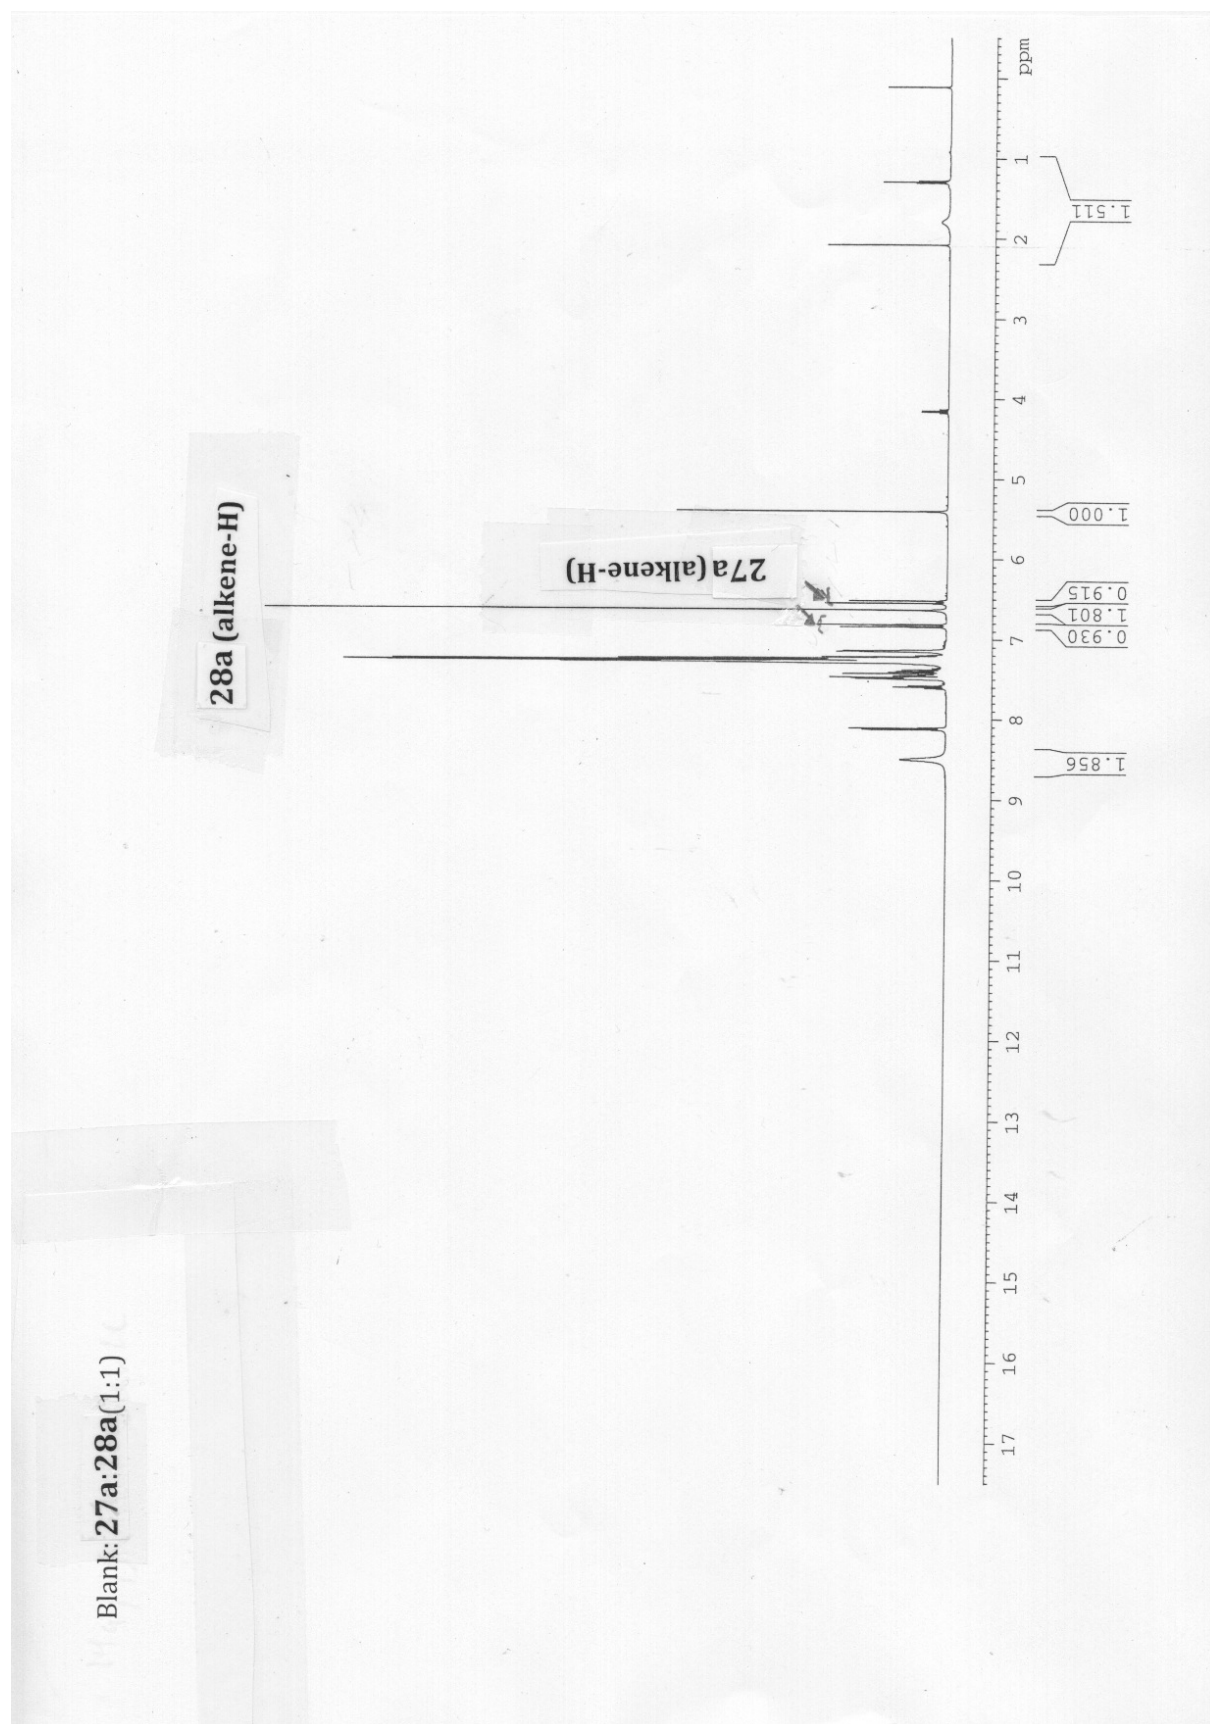

Fig. S17  $^1\text{H}$  NMR (400 MHz,  $\text{CDCl}_3$ ): Reference sample containing **27a:28a** (1:1).

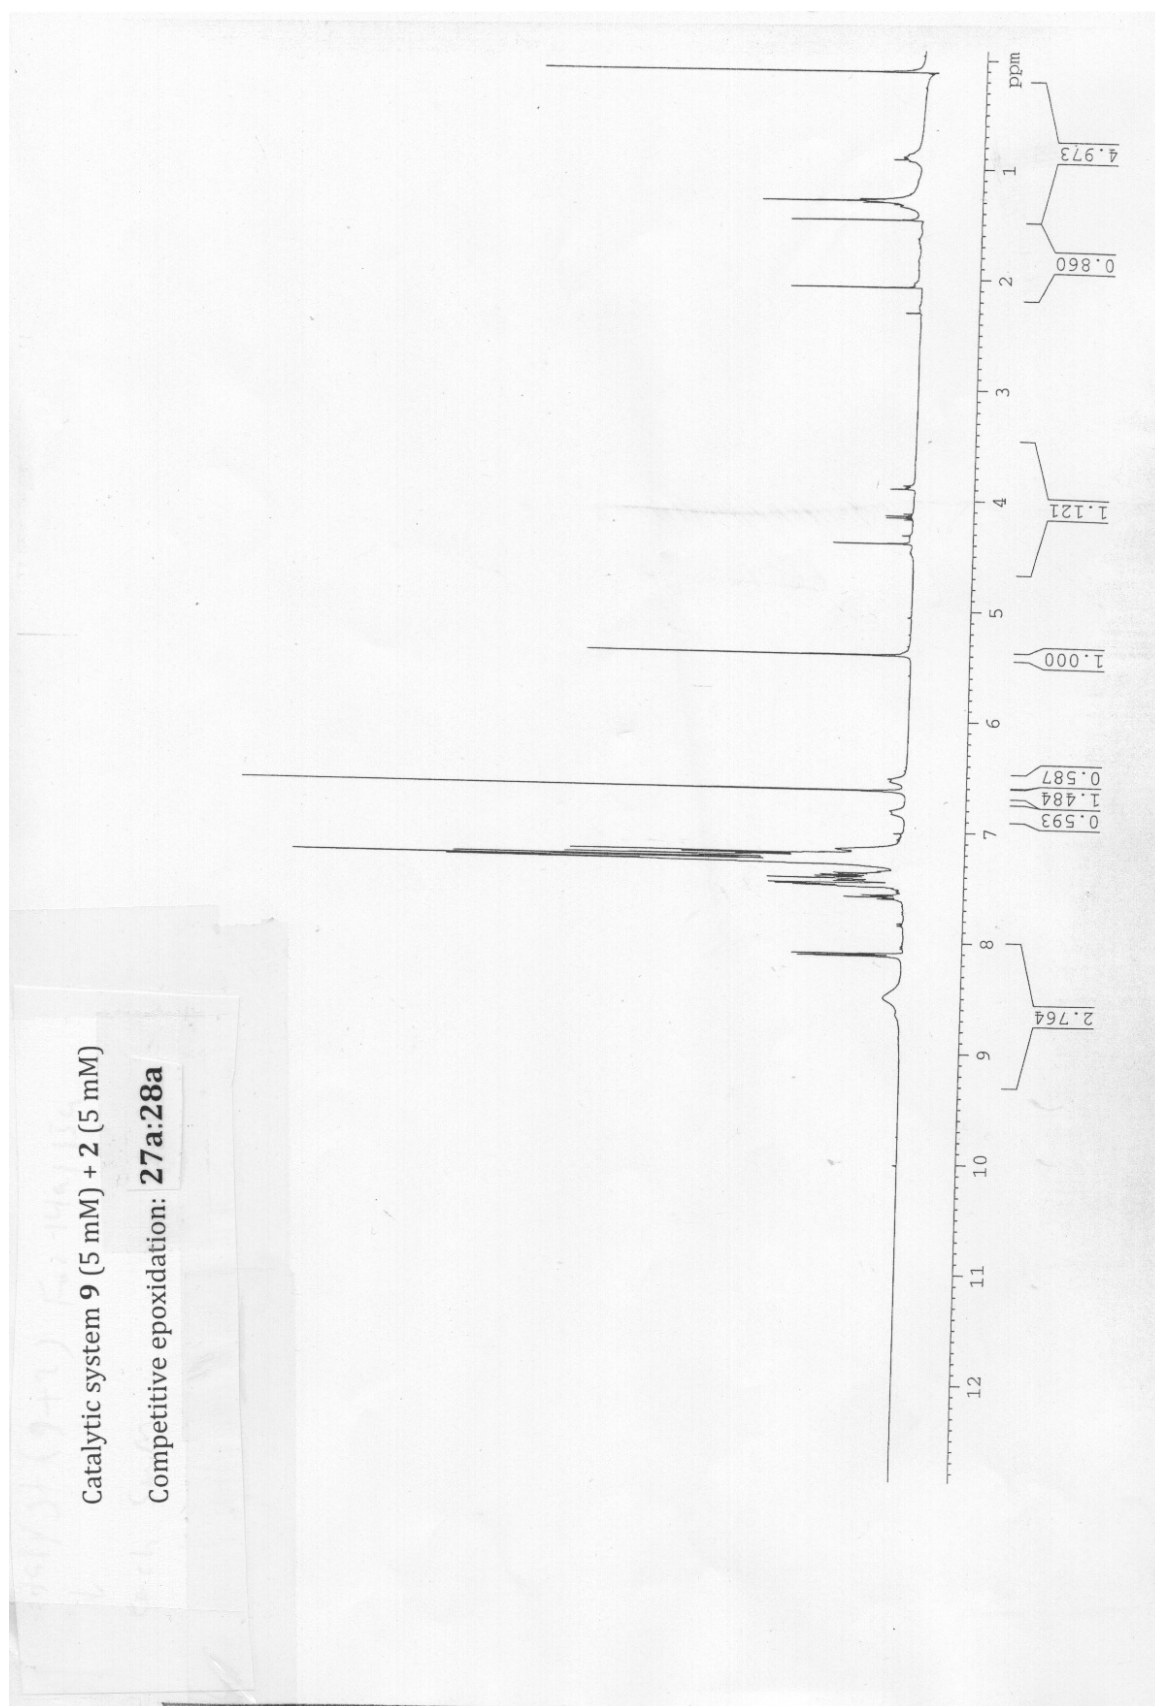

**Fig. S18** <sup>1</sup>H NMR (400 MHz, CDCl<sub>3</sub>) spectrum for the analysis of substrate selectivity in the competitive epoxidation **27a** vs. **28a** using system **9** (5 mM) + **2** (5 mM) in CH<sub>2</sub>Cl<sub>2</sub> as catalyst.

Table S1 The selectivity in the epoxidation of the styrene analogues catalysed by the different supramolecular systems.<sup>a</sup>

| Entry           | Cat. system<br>(mM)             | Selectivity by<br>GC <sup>b</sup> /NMR <sup>b</sup> |      |              |      |
|-----------------|---------------------------------|-----------------------------------------------------|------|--------------|------|
|                 |                                 | <b>4a:5a</b>                                        |      | <b>4b:5b</b> |      |
| 1               | <b>1</b> (5) + <b>2</b> (5)     | 1.55                                                | 1.43 | 1.52         | 1.50 |
| 2               | <b>1</b> (5) + <b>2</b> (15)    | 1.69                                                | 1.64 | 1.70         | 1.60 |
| 3               | <b>1</b> (0.5) + <b>2</b> (0.5) | 1.30                                                | 1.32 | 1.32         | 1.29 |
| 4               | <b>8</b> (5) + <b>2</b> (5)     | 1.66                                                | 1.65 | 1.86         | 1.89 |
| 5               | <b>8</b> (5) + <b>2</b> (15)    | 1.82                                                | 1.76 | 2.68         | 2.75 |
| 6               | <b>9</b> (5) + <b>2</b> (5)     | 1.80                                                | 1.73 | 1.95         | 2.06 |
| 7               | <b>9</b> (5) + <b>2</b> (15)    | 1.93                                                | 1.86 | 2.97         | 2.92 |
| 8               | <b>9</b> (0.5) + <b>2</b> (0.5) | 1.42                                                | 1.38 | 1.75         | 1.77 |
| 9               | <b>9</b> (5) + ZnTPP<br>(5)     | 0.99                                                | 1.08 | 1.02         | 1.06 |
| 10 <sup>c</sup> | <b>9</b> (5) + <b>2</b> (5)     | 1.02                                                | 1.04 | 1.08         | 1.06 |
| 11 <sup>d</sup> | <b>9</b> (5) + <b>2</b> (5)     | 1.34                                                | 1.28 | 1.73         | 1.75 |
| 12              | <b>12</b> (5)                   | 1.15                                                | 1.13 | 1.15         | 1.22 |
| 13              | <b>12</b> (15)                  | 1.24                                                | 1.23 | 1.30         | 1.34 |

<sup>a</sup> General procedure: catalyst part **1**, or **8**, or **9** (3 μmol each), receptor part **2** (3 or 9 μmol each), substrate pairs of **4** and **5** (30 μmol each), PhIO (24 μmol), internal standard benzyl benzoate (15 μmol), DCM (0.6 ml or 6 mL), and rt. Consistently 70% of the product was epoxide (GC). <sup>b</sup> Relative selectivity; see ref. 3d for its calculation. In this case based only on the disappearance of starting material. <sup>c</sup>receptor without Zn. <sup>d</sup>4-Ethylpyridine (90 μmol) added.

Table S2 The selectivity in the epoxidation of stilbene analogues catalysed by the different supramolecular systems.<sup>a</sup>

| Entry | Cat. system<br>(mM)          | Selectivity by GC <sup>b</sup> /NMR <sup>b</sup> |      |                |      |                |      |
|-------|------------------------------|--------------------------------------------------|------|----------------|------|----------------|------|
|       |                              | <b>26b:28b</b>                                   |      | <b>27b:28b</b> |      | <b>27a:28a</b> |      |
| 1     | <b>1</b> (5) + <b>2</b> (5)  | 1.70                                             | 1.75 | 1.22           | 1.26 | 0.75           | 0.69 |
| 2     | <b>1</b> (5) + <b>2</b> (15) | 2.38                                             | 2.35 | 1.38           | 1.42 | 0.58           | 0.56 |
| 3     | <b>8</b> (5) + <b>2</b> (5)  | 1.95                                             | 1.91 | 1.37           | 1.25 | 1.92           | 1.90 |
| 4     | <b>8</b> (5) + <b>2</b> (15) | 3.28                                             | 3.34 | 1.51           | 1.48 | 3.27           | 3.25 |
| 5     | <b>9</b> (5) + <b>2</b> (5)  | 2.22                                             | 2.25 | 1.18           | 1.25 | 2.15           | 2.12 |
| 6     | <b>9</b> (5) + <b>2</b> (15) | 3.40                                             | 3.46 | 1.45           | 1.51 | 3.36           | 3.44 |
| 9     | <b>12</b> (5)                | 1.36                                             | 1.34 | 1.08           | 1.06 | 1.06           | 1.09 |
| 10    | <b>12</b> (15)               | 1.52                                             | 1.56 | 1.18           | 1.22 | 1.28           | 1.32 |

<sup>a</sup> General procedure: catalyst part **1**, or **8**, or **9** or catalyst **12** (3 μmol each), receptor part **2**, (3 or 9 μmol each), substrates pairs of **26**, **27**, **28** (30 μmol each), PhIO (24 μmol), internal standard (benzyl benzoate) (15 μmol), DCM (0.6 ml), and rt. Consistently 70% of the product was epoxide (GC). <sup>b</sup> Relative selectivity; see ref. 3d for its calculation. In this case based only on the disappearance of starting material. n.d = not determined.





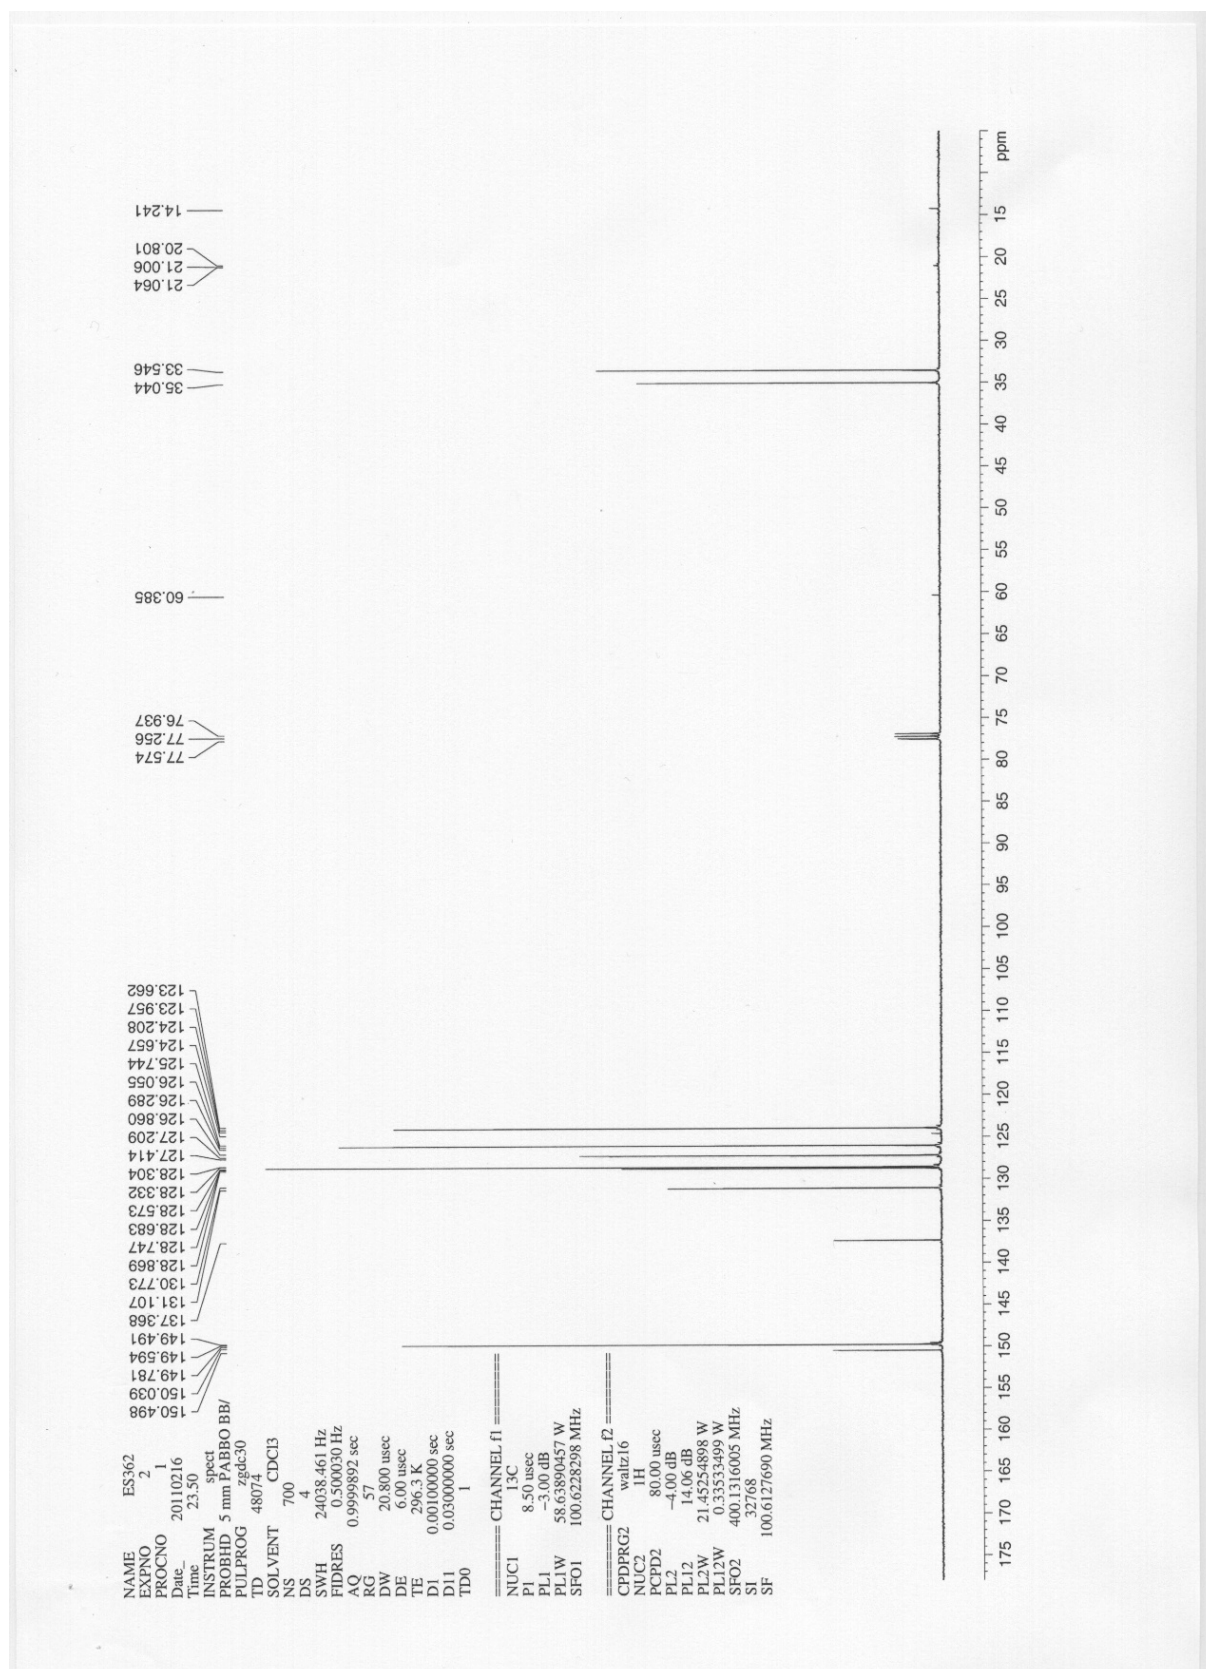

**Fig. S20**  $^{13}\text{C}$  NMR (100 MHz,  $\text{CDCl}_3$ ) spectrum of **4b**.

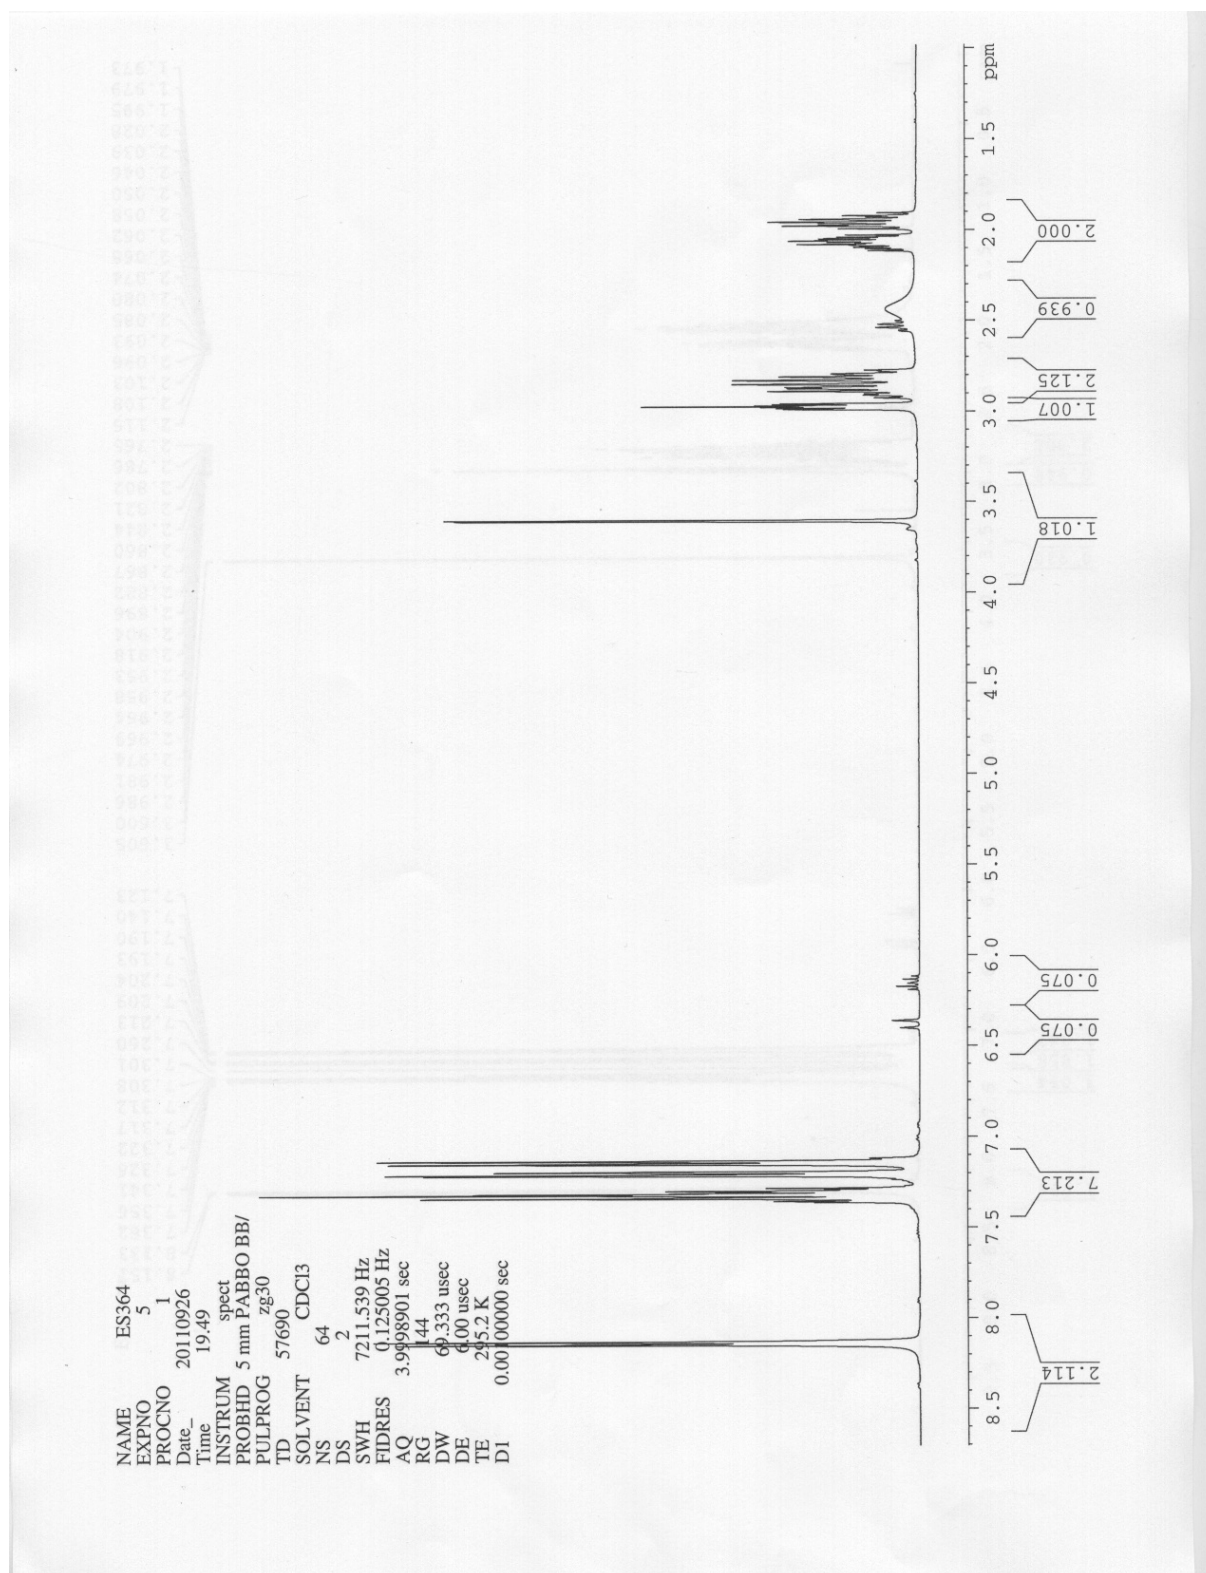

Fig. S21  $^1\text{H}$  NMR (400 MHz,  $\text{CDCl}_3$ ) spectrum of **6b**.

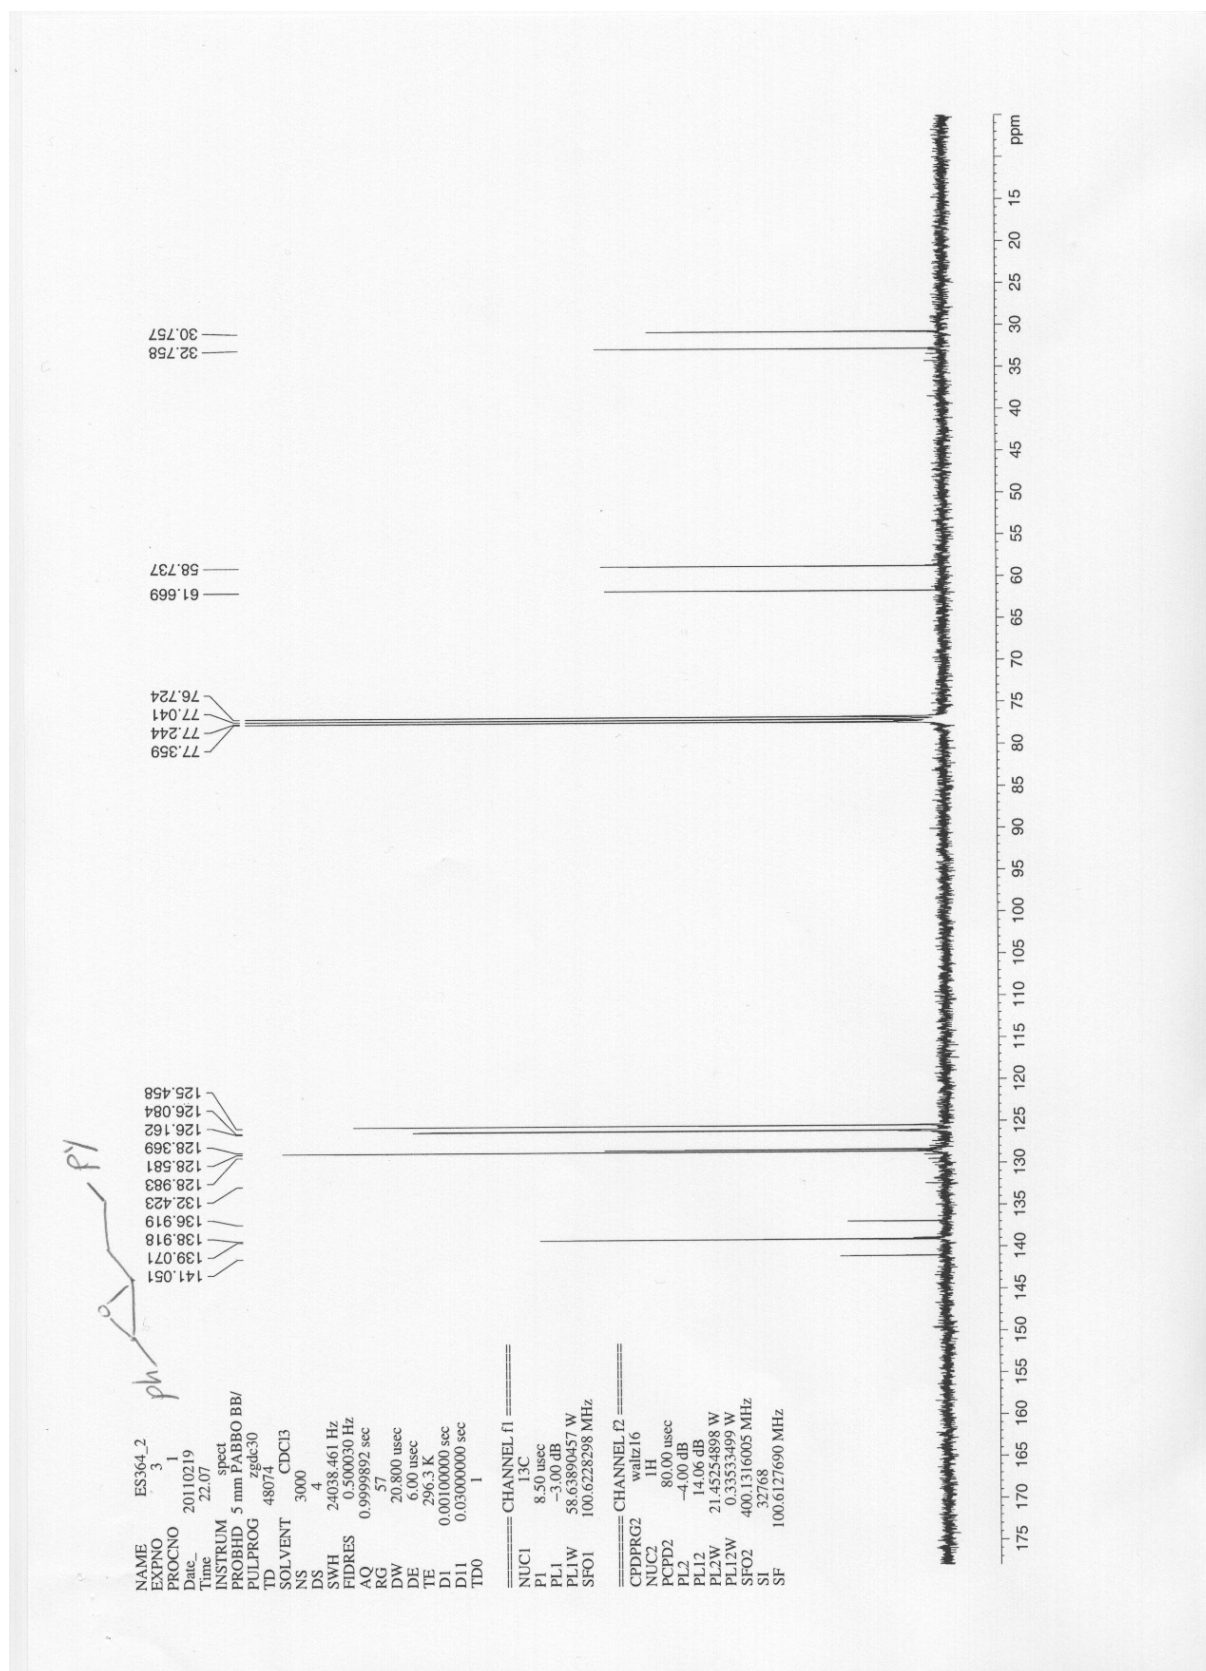

Fig. S22  $^{13}\text{C}$  NMR (100 MHz,  $\text{CDCl}_3$ ) spectrum of **6b**.
